# Supplementary material for: Massive conformational changes during thermally induced self-metalation of 2H-tetrakis-(3,5-di-tert-butyl)-phenylporphyrin on Cu(111)
Source: Royal Society of Chemistry journal article supplement (doi:10.1039/c4cc03708a), 2014-01-01
Supplement: c4cc03708a1.pdf [file c4cc03708a1.pdf]

## **Massive conformational changes during thermally induced self-metalation of 2H-Tetrakis-(3,5-di-tert-butyl)-phenylporphyrin on Cu(111)**

M. Stark,<sup>a</sup> S. Ditze,<sup>a</sup> M. Lepper,<sup>a</sup> L. Zhang,<sup>a</sup> H. Schlott,<sup>a</sup> F. Buchner,<sup>a, b</sup> M. Röckert,<sup>a</sup> M. Chen<sup>a, c</sup>, O. Lytken,<sup>a</sup> H.-P. Steinrück,<sup>a</sup> and H. Marbach<sup>a, \*</sup>

<sup>a</sup> Lehrstuhl für Physikalische Chemie II, Egerlandstrasse 3 and Interdisciplinary Center for Molecular Materials (ICMM), Universität Erlangen-Nürnberg, D-91058 Erlangen, Germany.

<sup>b</sup> Present address: Helmholtz Institut Ulm and Institut für Oberflächenchemie und Katalyse, Universität Ulm, Albert-Einstein Allee 11, D-89081 Ulm, Germany.

<sup>c</sup> Present address: Fachbereich Chemie, Physikalische Chemie, Philipps-Universität Marburg, Hans-Meerwein-Straße 6, D-35032 Marburg, Germany.

\* Correspondence to: Hubertus Marbach, email: [hubertus.marbach@fau.de](mailto:hubertus.marbach@fau.de)

# Supporting Information

## Determination of the internal conformation of 2HTTBPP on Cu(111)

The appearance of TTBPP molecules is usually dominated by the peripheral tert-butyl groups such that four of them form a rectangle. The geometric shape of the rectangle (perimeter and aspect ratio of long to short side) can be used to determine the intramolecular conformation of the molecules based on the geometric considerations shown in Fig. S2. A detailed description of the estimation procedure can be found in<sup>1</sup>.

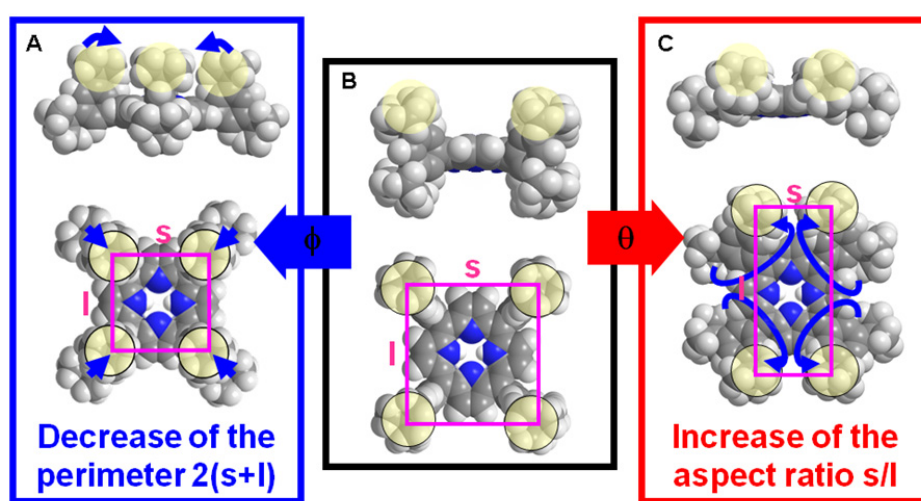

**Figure S1:** Scheme on how the intramolecular conformation 2HTTBPP (given by the twist angle  $\theta$  and tilt angle  $\phi$  of the peripheral phenyl groups) determines the geometry of a rectangle (purple) formed by four tert-butyl groups (yellow circles). (B) side view and top view of a space filling model of 2HTTBPP with the phenyl group oriented perpendicular to the plane of the porphyrin macrocycle (twist angle  $\theta = 90^\circ$ , tilt angle  $\phi = 0^\circ$ ). In (C), a possible molecular deformation is shown, with the phenyl groups rotated out of the porphyrin macrocycle plane (twist angle  $\theta > 0^\circ$ ). Thereby, the quadratic arrangement of the upper tert-butyl groups (indicated by a yellow circle) changes to a rectangle, which effectively changes the aspect ratio,  $s/l$ , of the short and long sides of the rectangle. In (A), the phenyl groups are tilted upwards out of the plane of the porphyrin macrocycle (tilt angle  $\phi > 0^\circ$ ). Thereby, the distance between the upper tert-butyl groups is reduced, resulting in a decreased perimeter,  $2(s+l)$ , of the corresponding rectangle. By comparing the experimental values  $s_{\text{exp}}$  and  $l_{\text{exp}}$  extracted from high-resolution STM images with the values  $s_{\text{mod}}$  and  $l_{\text{mod}}$  measured from corresponding space filling models (CambridgeSoft, Chem3D Pro 12.0.2.1076) an estimation of twist and tilt angle is possible.

## Reference

- (1) Buchner, F.; Comanici, K.; Jux, N.; Steinrück, H.-P.; Marbach, H. *J. Phys. Chem. C* **2007**, *111*, 13531.

**Bias voltage dependence of STM of 2HTTBPP and CuTTBPP on Cu(111)**

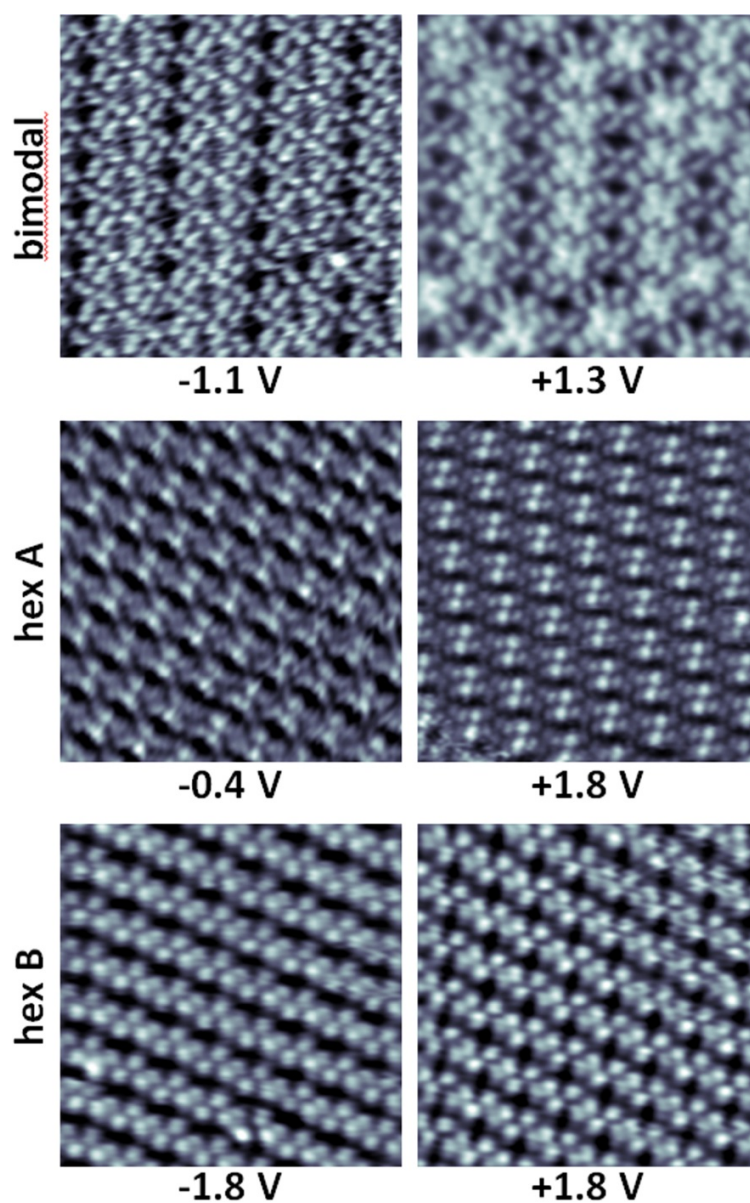

**Figure S2:** Set of images of bimodal, *hexA* and *hexB* domains at positive and negative bias. The appearance of the molecules is due to their upper tert-butyl groups and thus to a large extent independent of the bias voltage. All images were acquired in constant current mode with a tunneling current of 30 pA.

### C 1s XP spectra

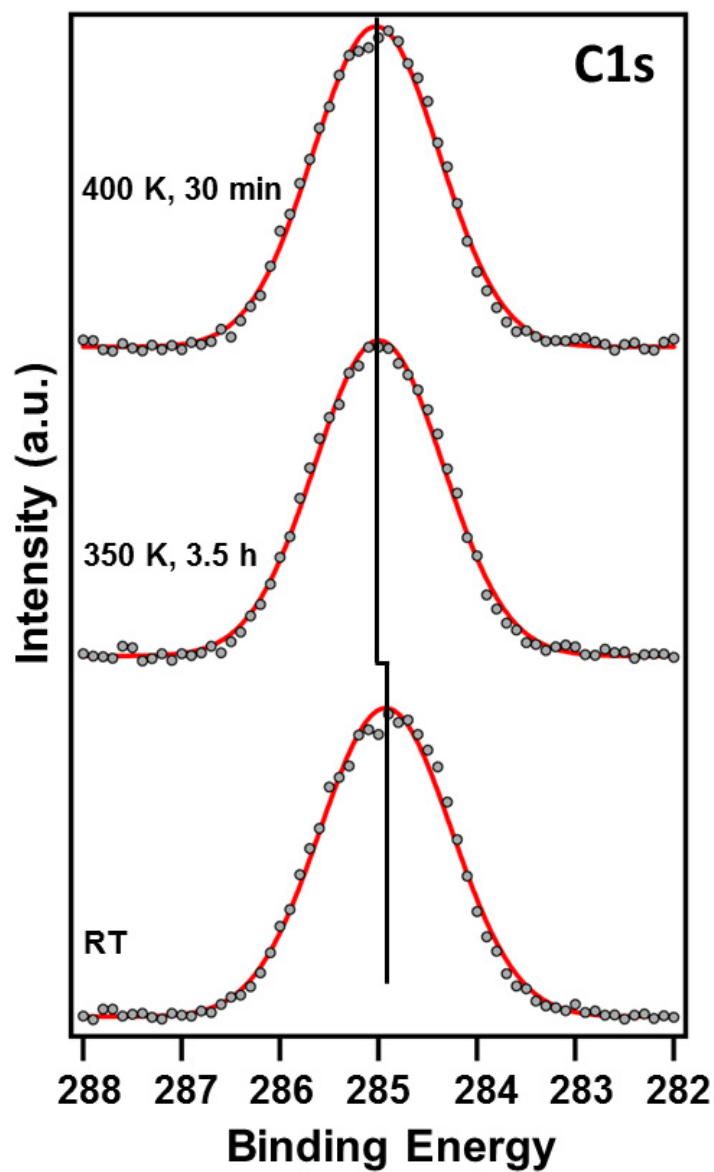

**Figure S3:** C 1s XP spectra of 2HTTBPP on Cu(111) for the as prepared layer (bottom) and after the indicated heat treatments; the topmost spectrum corresponds to almost fully metalated CuTTBPP (81 %, see Fig. 2). Upon metalation of 2HTTBPP, the C 1s peak shifts slightly by 0.1 eV to higher binding energies, in agreement with a reduced final state screening as the molecule moves away from the surface. The shift is accompanied by a slight narrowing of the FWHM from 1.57 to 1.51 eV.
